# Supplementary material for: Effect of Pod e-Cigarettes vs Cigarettes on Carcinogen Exposure Among African American and Latinx Smokers: A Randomized Clinical Trial
Source: PubMed Central journal article supplement (PMC7675102; doi:10.1001/jamanetworkopen.2020.26324), 2020-11-18
Supplement: jamanetwopen-e2026324-s001.pdf [file jamanetwopen-e2026324-s001.pdf]

1  
2  
3  
4  
5  
6  
7  
8  
9  
10  
11  
12  
13  
14  
15  
16  
17  
18  
19  
20  
21  
22

TOXICANT EXPOSURE AND HARM PERCEPTIONS IN CIGARETTE SMOKERS  
WHO USE OR DO NOT USE E-CIGARETTES

**STUDY PROTOCOLS & PROCEDURES**

- I. Introduction
- II. Study Sites
- III. Study Personnel
- IV. Participant Recruitment
- V. Participant Screening and Enrollment
- VI. Study Design and Timeline
- VII. Participant Retention
- VIII. Laboratory Procedures and Sampling
- IX. Laboratory Analysis
- X. Study Visits Overview
- XI. Study Questionnaires
- XII. Data Management
- XIII. Recording and Reporting of Adverse Effects

23 **I. Introduction**  
24

25 This study, **Toxicant Exposure and Harm Perceptions in Cigarette Smokers Who**  
26 **Use or Do Not Use E- Cigarettes** is funded by the National Institutes of Health and  
27 registered on ClinicalTrials.gov.  
28

29 **Document Purpose**  
30

31 This document is intended to detail all relevant study protocols and procedures. Given  
32 rapid advancement in the understanding of the effects of smokers switching to  
33 electronic cigarettes, particularly on toxicant exposure (our primary outcome), we  
34 considered how to maximize the scientific contribution of the project. The body of work  
35 on the use of electronic cigarettes for risk reduction has been conducted with the  
36 general population and is now moving into vulnerable populations who carry a  
37 substantial disease burden from smoking. The investigative team is uniquely positioned  
38 to create progress in the field by examining the research questions with ethnically  
39 diverse populations who face significant barriers to smoking cessation. A commitment  
40 was made at the San Diego site to enroll Latinx smokers and to offer the study in  
41 Spanish in order to address the research questions with an under-studied population.  
42 NIH prior approval and Institutional Review Board (IRB) approval was granted to add  
43 the University of Kansas Medical Center as a study site to enroll African American  
44 smokers. This change enhances the ethnic diversity of enrolled participants as well as  
45 expands the science on risk reduction. The second study site (University of Kansas  
46 Medical Center) agreed to rely on the IRB of the primary institution (CSUSM).

47 Additionally, because this project was funded on the first round, reviewer comments  
48 were addressed in the implementation of the study protocol post-proposal. These  
49 changes impacted inclusion/exclusion criteria and the length of the intervention period.  
50 There were no changes to aims, hypotheses, or sample size.  
51

52 The following Project Summary reflects our implemented protocol and contains an  
53 updated premise reflecting the ethnic minority population focus.  
54  
55

56 **Project Summary**

57 This proposal addresses a critical gap in the research regarding the use of electronic  
58 cigarettes (ECs) for harm reduction by ethnic minority smokers. Smokers cite reducing  
59 perceived harm from smoking as a leading reason for using ECs, and ECs have been  
60 suggested by tobacco researchers as a potential harm reduction vehicle for smokers  
61 who cannot or will not achieve smoking cessation. The National Academies of Science  
62 concluded that ECs pose significantly less exposure to toxicants and less short-term  
63 health risks than combustible cigarettes. However, smokers with less education and  
64 from ethnic minority backgrounds are less likely to switch to exclusive EC use.  
65 Socioeconomic disparities in switching to ECs will perpetuate a greater burden of  
66 tobacco-related death and disease among disadvantaged populations. As a human  
67 behavioral EC study in which toxicant exposure via the tobacco-specific nitrosamine,  
68 NNAL, a highly potent pulmonary carcinogen will be measured, this project addresses a

69 critical barrier in the field and advances science on the widely used practice of EC use  
70 for harm reduction among the two largest ethnic minority groups in the US, Latinx and  
71 African Americans. Furthermore, this will be among the first studies to determine how  
72 uptake of ECs affects cognitive-perceptual factors involved in sustained tobacco use,  
73 such as risk perceptions, utility of smoking, self-efficacy to quit, and tobacco  
74 dependence among under-represented minority smokers. This study is directly relevant  
75 to the NIH's mission to address cancer risk factors and supports the long-term objective  
76 to reduce the disease burden of tobacco use. In the current proposal, Latinx ( $n=90$ ) and  
77 African American ( $n=90$ ) cigarette smokers will be randomized in a 2:1 fashion to an EC  
78 group ( $n=60$  per racial/ethnic group;  $N=120$ ) or an assessment-only control group ( $n=30$   
79 per racial/ethnic group;  $N=60$ ). Those randomized to EC will receive a 6-week supply of  
80 a fourth generation EC starter kit with their choice of liquid flavor from a standard list.  
81 Those randomized to assessment only ( $n=60$ ) will not be provided with an EC. Tobacco  
82 consumption in both groups will be assessed at weeks 0 (baseline), 2, and 6. Changes  
83 in toxic exposure (NNAL, a primary lung carcinogen and the primary outcome) and  
84 carbon monoxide (CO) will be measured from baseline to week 6. Planned covariates  
85 include study site, gender, income, tobacco dependence score, and mental health  
86 symptoms.

87

88 **Aim 1. To characterize the toxic exposure of cigarette smokers randomized to the**  
89 **EC group compared to cigarette smokers randomized to assessment-only**  
90 **controls**

91 *Hypothesis 1:* It is hypothesized that toxicant exposure from baseline to week 6  
92 will be significantly lower in the EC group compared to the assessment-only  
93 group. *Hypothesis 2:* It is hypothesized that change in cigarette consumption in  
94 the EC group from baseline to week 6 will be associated with reduction in  
95 toxicant exposure from baseline to week 6.

96

97 **Aim 2. To assess the effects of uptake of e-cigarettes on perceptions of harm and**  
98 **utility of products**

99 It is hypothesized that from baseline to week 6, the EC as compared to control  
100 arm a) will have decreased perceptions of harm to their health from current  
101 tobacco use, b) will increase positive utility of EC and increase negative utility of  
102 cigarette products, and c) will have decreased expectations of the difficulty of  
103 quitting cigarette smoking.

104

105 **Aim 3. To understand patterns of tobacco product consumption among smokers**  
106 **switching to electronic cigarettes**

107 Changes in tobacco product consumption (cotinine-verified), subjective effects of  
108 smoking, and levels of tobacco dependence from baseline to week 6 will be  
109 examined in the EC group and baseline predictors of those patterns, including  
110 demographic, smoking history, and psychosocial characteristics will be identified.

111

112 This project will advance science on the widely used practice of EC use for harm  
113 reduction by examining change in toxicant exposure via NNAL and change in cognitive-  
114 perceptual variables among African American and Latinx smokers switching to EC  
115 compared to smokers who continue to use cigarettes alone. Study findings will have  
116 major public health implications, particularly for smokers who have experienced difficulty

PROJECT SWITCH Protocol

NIH PROJECT #5SC3GM122628-02; CLINICALTRIAL.GOV IDENTIFIER: NCT03511001

117 in quitting cigarettes and for whom EC use as a harm reduction strategy has been  
118 considered. The study will enhance the research environment at the PI's university  
119 which is classified as both a Hispanic Serving Institution and an Asian American-Native  
120 American-Pacific Islander Serving Institution.

121

122

123

124

- 125 **Important Terms and Abbreviations**  
 126 NNAL 4-(methylnitrosamino)-1-(3-pyridyl)-1-butanol  
 127 REDCap Research Electronic Data Capture  
 128 CO Carbon Monoxide  
 129 TLFB Timeline Followback

130  
 131 **II. Study Sites**  
 132

- 133 1. San Diego  
 134 a. California State University San Marcos – 333 S Twin Oaks Valley Rd,  
 135 San Marcos, CA 92096  
 136 b. San Diego State Research Foundation – 4283 El Cajon Blvd Suite  
 137 226, San Diego, CA 92105  
 138 c. Neighborhood Healthcare, Behavioral Health – 425 N. Date Street  
 139 Escondido, CA 92025  
 140 2. Kansas City – Swope Medical Center – 3801 Blue Pkwy, Kansas City, MO  
 141 64130

142  
 143 **III. Study Personnel**  
 144

| Name                          | Organization                            | Role                   |
|-------------------------------|-----------------------------------------|------------------------|
| Kim Pulvers, PhD, MPH         | California State University San Marcos  | Principal Investigator |
| Jasjit Ahluwalia, MD, MPH, MS | Brown University                        | Co-Investigator        |
| Nicole Nollen, PhD            | University of Kansas School of Medicine | Co-Investigator        |
| Tricia Snow, MA               | University of Kansas Medical Center     | Project Manager        |
| Brian Hernandez, BA           | University of Kansas Medical Center     | Lead Researcher        |
| Michael Arnold, BA            | University of Kansas Medical Center     | Research Assistant     |
| Myra Rice, BA                 | California State University San Marcos  | Project Manager        |
| Amanda Dean, BA               | California State University San Marcos  | Research Assistant     |
| Dalia Hipolito, BA            | California State University San Marcos  | Research Assistant     |
| Jennifer Mosley, BA           | California State University San Marcos  | Research Assistant     |
| Mirella Orozco, BA            | California State University San Marcos  | Research Assistant     |
| Ana Leon, BA                  | California State University San Marcos  | Research Assistant     |
| Justin Sanchez                | California State University San Marcos  | Research Assistant     |
| Crystal Marez, BA             | California State University San Marcos  | Research Assistant     |
| Juan Alva                     | California State University San Marcos  | Research Assistant     |
| John Le                       | California State University San Marcos  | Research Assistant     |
| Laura Wells, BA               | California State University San Marcos  | Research Assistant     |
| Jeremy Mills-Shimmel          | California State University San Marcos  | Research Assistant     |
| Shyla Everett                 | California State University San Marcos  | Research Assistant     |
| Daniell Derry                 | California State University San Marcos  | Research Assistant     |
| Flavia Ponce, BS              | University of California San Diego      | Research Assistant     |
| Nathan Au-Yeng, BS            | University of California San Diego      | Research Assistant     |
| Madison Garrett               | University of California San Diego      | Research Assistant     |
| Alexis Osuna                  | San Diego State University              | Research Assistant     |

145 *Table 1.* Study personnel for Project Switch.

#### 146 **IV. Participant Recruitment**

147 Recruitment will utilize online sources including Craigslist and Facebook, as well as  
148 radio advertisements, newspaper advertisements, flyers, information cards, clinic  
149 referrals, participant referrals, and community outreach. Enrolled participants will be  
150 encouraged to refer other smokers to the study and provided material such as  
151 information cards, pens, and t-shirts to facilitate referrals.

152  
153 **Sample Size.** We estimated our sample requirements using power analyses for primary  
154 aims to characterize the reduction in toxic exposure of cigarette smokers randomized to  
155 the e-cigarette group compared to cigarette smokers randomized to assessment-only  
156 controls (Aim 1:H1) from baseline to week 6 will be significantly lower in the EC group  
157 compared to the assessment-only group. Empirical power estimates were assessed by  
158 generating multivariate random samples that were matched to the expected response  
159 patterns for smokers in control and switching arms with each condition using the same  
160 correlation structure of assessments over time as observed in a previous study. In the  
161 switching condition we expect larger effects ( $d=-0.67$ ) on primary outcomes (NNAL) for  
162 the ~40% of smokers able to switch more completely relative to smokers partially  
163 switching ( $d=-0.16$ ). With no change expected in control, we powered primary outcomes  
164 for end-of-treatment analyses using an average of effects given 30% of switching  
165 smokers with large and 70% with small effects. With a median effect of  $-0.37$  ( $SD=0.11$ )  
166 across 1000 data sets, simulations revealed that the planned design would provide  
167 greater than 0.82 power for detecting the treatment differences with a sample of 180  
168 subjects, with an allowance for up to 20% attrition. For Aim1: H2 we will have power to  
169 detect moderate effects of changes in cigarette consumption on change in toxicants. In  
170 published effects of differences in consumption levels on nitrosamines, 77 differences in  
171 consumption (20 vs 10 cig/day) reflected mean difference in log NNAL of 2.60-  
172 2.35=0.24 and effect sizes with  $d=0.48$  after 10 weeks 78. We estimate adequate power  
173  $>0.80$  given expected cigarette reductions. Changes in cognitive measures (Aim 2)  
174 including decreased perception of harm, average differences in utility of combustible  
175 and EC, and increased self-efficacy for quitting are expected to be moderately  
176 associated with EC use. Empirical power analyses using regression models of change  
177 in cognitive measures over 1000 simulated data sets support the ability to detect  
178 moderate effects ( $d>0.30$ ) using a standardized difference in means of cognitive  
179 measures with power  $>0.80$ .

180

#### 181 **V. Participant Screening and Enrollment**

182 Prospective participants will be determined eligible or ineligible within 48 hours of initial  
183 contact. If eligible, the baseline visit will be scheduled, and a postcard reminder sent  
184 out. Screening will occur over the phone, in person, or with an online screening survey  
185 developed in REDCap.

186

187 Final eligibility is not decided until baseline visit, contingent on blood pressure under  
188 160 (systolic) and 105 (diastolic), carbon monoxide over 5 PPM to validate smoking  
189 status, and researcher-assessed stability. Participants who do not meet criteria will not  
190 be included in the study and given a smoking cessation referral. San Diego ineligible  
191 participants will be referred to the California Smokers' Helpline and Kansas City  
192 ineligible participants will be referred to the Kansas Tobacco Quitline. Transportation will  
193 be provided to and from study visits when needed in San Diego.

194  
195  
196  
197  
198  
199  
200  
201  
202  
203  
204  
205  
206  
207  
208  
209  
210  
211  
212  
213  
214  
215  
216  
217  
218  
219  
220  
221  
222  
223  
224  
225  
226  
227  
228  
229  
230  
231  
232  
233  
234  
235  
236  
237  
238  
239  
240

**A. Inclusion Criteria**

- ≥ 21 years of age
- Smoked cigarettes on ≥ 25 of past 30 days
- Smoked ≥ 5 cigarettes per day on days that smoked
- Smoked cigarettes for ≥ 6 months
- Carbon monoxide > 5 PPM at baseline
- Blood pressure systolic or diastolic < 160/105
- Hispanic/Latinx at San Diego or Black/African American at Kansas City
- Fluent in English or Spanish
- Willing to switch from smoking cigarettes to e-cigarettes for 6 weeks
- Regular access to a telephone
- Transportation to attend Swope Health Central in next six weeks (Kansas City)

**B. Exclusion Criteria**

- Primary use of other tobacco products or equal use of cigarettes and other tobacco products
- E-cigarette use on ≥ 4 of the past 30 days
- Currently in a smoking cessation program or other clinical trial
- Use of nicotine replacement therapy or medicine which aids smoking cessation in the past 30 days
- Hospitalizations for a psychiatric issue in the past 30 days
- Heart-related event in the past 30 days. Examples include heart attack, stroke, severe angina (i.e. chest pain), ischemic heart disease, and vascular disease
- Planning to move out of San Diego or Kansas City in the next 6 weeks
- Another person in the household enrolled in the study
- Women: pregnant, breastfeeding, or planning to become pregnant in the next six months
- Screener judgment about unstable mental status or health status

**VI. Study Design and Timeline**

This study is a randomized controlled trial using a 2:1 study randomization ratio. The treatment group will receive an e-cigarette and nicotine pods for six weeks and are encouraged to make a complete switch from combustible cigarettes to e-cigarettes. The study will consist of three in-person visits (baseline, week 2, and week 6) in which measurements are conducted and behavioral support is provided to the e-cigarette group. Phone calls will be scheduled between the visits (week 1 and week 4) to confirm appointments, collect data on tobacco use, and to support switching to e-cigarettes (e-cigarette group only).

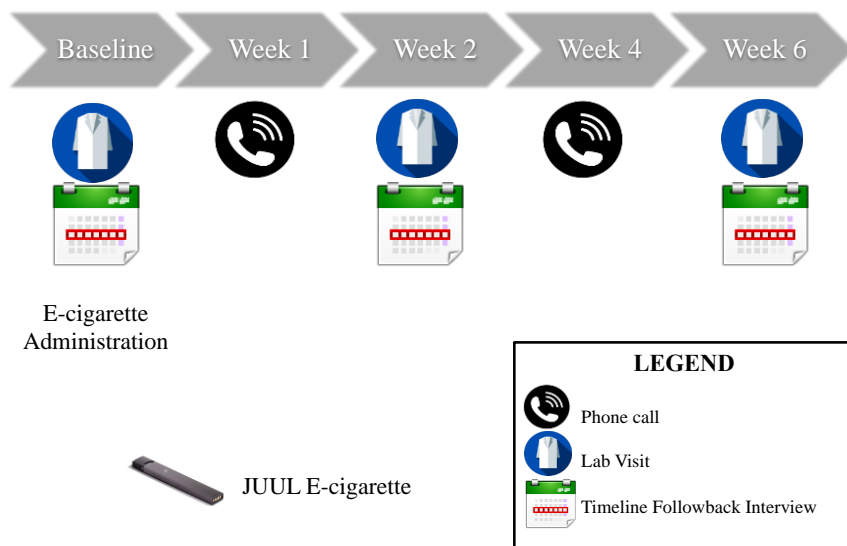

241  
242 *Figure 1. Study Timeline.*

243  
244 **Informed Consent.** The informed consent will be reviewed by having the researcher  
245 read the consent form out loud. The participant will be given time to read the informed  
246 consent form and ask questions. It will be made clear in the consent form that the  
247 participant has the option to take more time to consider their desire to participate in the  
248 study and reschedule at a later date, or to decline to participate at any point. The study  
249 begins once the participant signs the consent form, indicating understanding of the  
250 procedures, requirements, and consent.

251  
252 **Incentives.** Participants will be compensated for their time during the lab visits at  
253 escalating increments of \$20 at baseline, \$40 at week 2, and \$60 at week 6, totaling up  
254 to \$120. Participants in the e-cigarette group are instructed that full compensation is  
255 contingent upon bringing back their used and unused pods to their next visit. At week 2  
256 and week 6, \$20 of compensation is contingent upon bringing back pods. Those in the  
257 e-cigarette group have the opportunity to participate in a follow-up phone assessment  
258 six months after enrollment, entailing an additional \$20 compensation.

259  
260 **Study E-cigarettes.** Participants in the e-cigarette group will be provided JUUL, a  
261 nicotine-salt based e-cigarette (see Figure 2). Participants will have the flavor selection  
262 of Virginia tobacco, cool mint, menthol, or mango pods containing .07 mL nicotine (5%  
263 nicotine). Pod use will be tracked using the Pod Count Form, requiring participants to  
264 bring to lab visits all used, unused, and partially used pods. Pods will be distributed  
265 based on cigarette use, and determined using the Pod Count Calculation Form.  
266 Education about switching will be verbally provided to the e-cigarette group. Participants  
267 will engage in motivational enhancement-based action planning and will receive JUUL  
268 usage instructions. Participants in the e-cigarette group will be provided a compatible  
269 wall adapter to ensure proper charging, a device carrying case, Q-tips to clean the  
270 device as needed, and a gallon Ziplock bag to store used pods.

271  
272



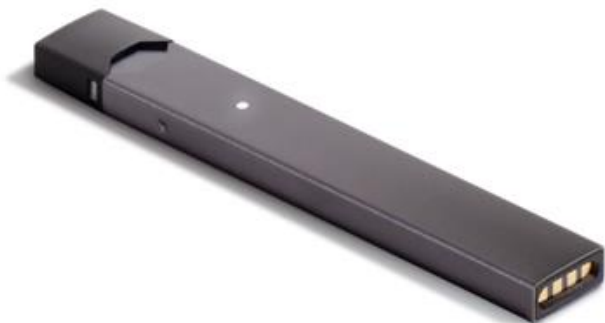

273  
 274 *Figure 2. JUUL electronic cigarette. Reprinted from JUUL Labs, Inc, Retrieved*  
 275 *December 9, 2018, from www.juul.com. Copyright 2018.*

276 **VII. Participant Retention**

277 Participant retention will be maintained by using a variety of contact methods including  
 278 call, text, email, physical letter in the mail, and reaching out to emergency contacts. No  
 279 more than six contact attempts, of various forms, will be made. Contacting emergency  
 280 contacts and sending a letter will be the last efforts made to contact an unreachable  
 281 participant. Additionally, participants will be sent postcards reminding them of the day  
 282 and time of their next lab visit, and appointment reminder cards will be given out at the  
 283 baseline and week 2 visit reminding about upcoming phone calls.

284  
 285 Lab visits will have pre-determined time windows. The week 2 visit can be scheduled up  
 286 to one week before or after the originally scheduled date of two weeks after the baseline  
 287 visit. The week 6 visit can be scheduled up to four weeks before or after the originally  
 288 scheduled date of six weeks after the baseline visit. Ripple protocol details the  
 289 scheduling protocol.

290  
 291 **VIII. Laboratory Procedures and Sampling**

292  
 293 Data from biological measurements and samples will be recorded on paper  
 294 and/or in REDCap.

295  
 296 The table below shows the equipment used for the biological measures, and timepoints  
 297 taken.

298

| Measure                                                      | Equipment                                               | Baseline | Week 2 | Week 6 |
|--------------------------------------------------------------|---------------------------------------------------------|----------|--------|--------|
| Carbon Monoxide                                              | coVital Bedfont Micro+ Smokerlyzer®                     | X        | X      | X      |
| Systolic Blood Pressure, Diastolic Blood Pressure, and Pulse | Omron® BP742N 5 Series Upper Arm Blood Pressure Monitor | X        | X      | X      |
| Height                                                       | Health o meter® 500KL                                   | X        |        |        |

|                                                             |                                                                                                                            |   |   |   |
|-------------------------------------------------------------|----------------------------------------------------------------------------------------------------------------------------|---|---|---|
|                                                             | Professional Digital Scale                                                                                                 |   |   |   |
| Weight                                                      | Health o meter® 500KL<br>Professional Digital Scale                                                                        | X |   | X |
| Spirometry: FVC, FEV1,<br>FEV1/FVC%, PEF, and FEF25-<br>75% | Futuremed® Discovery-2™<br>Desktop Spirometer                                                                              | X | X | X |
| Saliva (10 San Diego<br>participants)                       | Saliva collection aid (straw):<br>SB-WS No.61/524,096<br><br>Collection tube: Wheaton 1.8<br>mL yellow cap collection tube | X |   | X |
| Nasal Swab (20 Kansas City<br>Participants)                 | Leukosorb tubes, Q-tips,<br>saline                                                                                         | X |   | X |
| Urine                                                       | Dynarex Specimen Container<br>4oz. 118cc reorder No. 4253<br><br>Aliquots: Wheaton 20 ml<br>disposable scintillation vials | X | X | X |

299

300 *Table 2.* Biological measures, timepoints, and equipment for Project Switch.

301

302 **CO measurement.** Exhaled breath samples will be taken at all visits for carbon  
303 monoxide (CO), a by-product of smoke, using a Bedfont Micro+ Smokerlyzer. At  
304 baseline, CO measurement will be taken to confirm eligibility. A carbon monoxide level  
305 over 5ppm verifies smoking status. A carbon monoxide level 5ppm or lower at baseline  
306 makes a person ineligible to participate in the study. Participants will be allowed the  
307 opportunity to re-screen two weeks later.

308

309 **Blood pressure.** Systolic and diastolic blood pressure will be measured for screening  
310 purposes and throughout the study using a digital blood pressure cuff. If, at the baseline  
311 or week 2 visit, a participant's systolic blood pressure is greater than or equal to 160  
312 mm Hg or their diastolic blood pressure is greater than or equal to 105 mm Hg, they will  
313 not be eligible to participate or continue participating in the study. Pulse will also be  
314 measured but not as an exclusion criteria. Participants who are ineligible at baseline  
315 due to uncontrolled blood pressure will be allowed the opportunity to re-screen two  
316 weeks later.

317

318 **Height and weight.** A medical scale will be used for a one-time measure of height.  
319 Weight will be measured at baseline and week 6 visit, with shoes removed.

320

321 **Spirometry.** Lung function will be measured at all lab visits using a Discovery-2  
322 SpiroVision spirometer. At each session, participants will complete a minimum of three

323 maneuvers (depending on the quality) consisting of a strong exhale and a strong inhale.  
324 Participants will be given a mouthpiece at baseline that will be stored and used at  
325 subsequent visits. Participants will be given the option to manually hold their nose  
326 closed or to apply a nose clip.

327  
328 Spirometer measures include: (1) forced vital capacity, FVC (2) Forced expiratory  
329 volume in one second, FEV1 (3) The percentage of the FVC expired in one second,  
330 FEV1/FVC% (4) peak expiratory flow, PEF (5) Forced expiratory flow over the middle  
331 one half of the FVC, FEF25-75%.

332  
333 **Saliva sampling.** Saliva sampling is an exploratory addition to this study and will be  
334 taken from ten San Diego participants at baseline and week 6. The decision to take  
335 saliva sampling in San Diego resulted in an increase from the original  $n=90$  to an  $n=94$ .  
336 Samples will be frozen and transported the testing facility on dry ice.

337  
338 **Nasal swab sampling.** Nasal swab sampling is an exploratory addition to this study  
339 and will be taken from twenty Kansas City participants at baseline and week 6. The  
340 decision to take nasal swab sampling in Kansas City resulted in an increase of two  
341 participants for a final  $n=92$ . Samples will be frozen and transported the testing facility  
342 on dry ice.

343  
344 **Urine sampling.** Urine will be collected at all lab visits and refrigerated until aliquoting.  
345 Participants will be instructed to provide at least half of the specimen cup of urine (about  
346 60mL). Participants will be offered water at the beginning of lab sessions to help  
347 facilitate sampling.

348  
349 Urine will be processed by aliquoting the sample into two smaller samples, each 15 mL.  
350 One sample will test for cotinine and need to be pre-treated with sodium bisulfate to  
351 obtain a pH between 2 and 3. The second sample will test for NNAL and will receive no  
352 additional treatment. Both samples will be frozen and stored at  $-20\text{ }^{\circ}\text{C}$  before shipping  
353 with dry ice for testing.

354  
355 A urine log will provide the following information for each urine sample: (1) participant ID  
356 (2) study time point (3) date: mm/dd/yyyy (4) testing for: NNAL or cotinine. Each lab visit  
357 will produce two samples stored for further testing.

358  
359 Although urine will be taken at all three lab visits, only baseline and week 6 urine will be  
360 sent for testing. In the case of missing week 6 samples, week 2 samples will be sent  
361 instead as a method of imputation.

362  
363 **Sample shipment.** Specimens will be transported in a leak-proof Styrofoam container  
364 in leak-proof secondary packaging, with absorbent material placed at the bottom and  
365 sides of the container for absorption. 10-15lbs dry ice will be used to maintain storage  
366 temperature during transport.

367  
368  
369

370 **IX. Laboratory Analysis**

371  
 372 **Urine:** cotinine ng/mL, creatinine mg/mL, nitrosamine 4-(methylnitrosamino)-1-  
 373 (3-pyridyl)-1-butanol (NNAL) pg/mL, and 3-hydroxycotinine ng/mL

374  
 375 **Saliva:** Cytokine Panel and C-Reactive Protein

376  
 377 **Nasal Swab:** MMP9 ELISA in pg/mL and TGF-B1 ELISA in pg/mL

378  
 379  
 380 **X. Study Visits Overview**

381  
 382

| Baseline                                          | Week 1                | Week 2                                          | Week 4                | Week 6                              |
|---------------------------------------------------|-----------------------|-------------------------------------------------|-----------------------|-------------------------------------|
| Participant consent                               | Follow-up check-in    | Urine test                                      | Follow-up check-in    | Saliva sample (San Diego)           |
| Saliva sample (San Diego)                         | Yesterday tobacco use | Blood pressure test (must be less than 160/105) | Yesterday tobacco use | Urine test                          |
| Complete contact sheet                            |                       | Carbon monoxide test                            |                       | Blood pressure test                 |
| Blood pressure test (must be less than 160/105)   |                       | Eligibility check                               |                       | Carbon monoxide test                |
| Carbon monoxide test (must be greater than 5 ppm) |                       | Follow-up check in sheet (EC group)             |                       | Nasal swab (Kansas City)            |
| Nasal swab (Kansas City)                          |                       | Timeline follow back                            |                       | Weight                              |
| Final eligibility check and Study ID assignment   |                       | Spirometry test                                 |                       | Follow-up check in sheet (EC group) |
| Randomization                                     |                       | Week 2 survey                                   |                       | Timeline follow back                |
| Charge JUUL (EC group)                            |                       | Collect used JUUL pods (EC group)               |                       | Spirometry test                     |
| Timeline follow back                              |                       | Provide more JUUL pods (EC group)               |                       | Week 6 survey                       |
| Pod count form (EC group)                         |                       | Schedule visits/phone calls                     |                       | Collect used JUUL pods (EC group)   |
| Height and weight                                 |                       | Compensation                                    |                       | Tobacco cessation referral          |
| Baseline survey part 1                            |                       |                                                 |                       | Exit survey                         |
| Spirometry test                                   |                       |                                                 |                       | Compensation                        |
| Baseline survey part 2                            |                       |                                                 |                       |                                     |
| Cigarette questions and breathing conditions      |                       |                                                 |                       |                                     |
| E-cigarette switching fact sheet (EC group)       |                       |                                                 |                       |                                     |
| E-cigarette use instructions (EC group)           |                       |                                                 |                       |                                     |
| E-cigarette trial and                             |                       |                                                 |                       |                                     |

|                                             |  |  |  |  |
|---------------------------------------------|--|--|--|--|
| subjective effects questionnaire (EC group) |  |  |  |  |
| Baseline action planning (EC group)         |  |  |  |  |
| Schedule visits/phone calls                 |  |  |  |  |
| Reimbursement schedule                      |  |  |  |  |
| Urine test                                  |  |  |  |  |
| Compensation                                |  |  |  |  |

383 *Table 3.* Surveys and tests by study timepoint.

384  
 385 At each lab visit, participants will receive compensation and sign a receipt. At the end of  
 386 the study, participants will be given a referral to the California Smokers' Helpline (1-800-  
 387 NO-BUTTS) or Kansas Tobacco Quitline (1-800-QUIT-NOW).

388  
 389  
 390 **XI. Study Questionnaires**

391 Surveys will contain items on demographics, smoking measures, tobacco measures,  
 392 physiological measures, and psychosocial assessments. Given the possibility of low  
 393 literacy among participants, surveys will be verbally administered along with visual cue  
 394 cards.

395  
 396 **XII. Data Management**

397 Missing data will be minimized through extensive training of research staff in addition to  
 398 follow-up with participants. Data will be entered into REDcap electronically and paper  
 399 forms (biological measures and pod count forms) will be stored in participant files.  
 400 Paper forms with identifiable information such as consent and contact information will  
 401 be stored in a separate, locked location. TLFB data will be entered into excel, with  
 402 paper calendars and data entry forms stored in participant files. REDcap entry will  
 403 happen after the lab session and will be audited and checked by project managers  
 404 daily. REDCap is a secure, HIPAA-compliant, web-based application designed to  
 405 support data capture for research studies. All protocol-specified data will be linked by  
 406 unique subject ID, assigned at randomization. Paper files will be stored on site in a  
 407 locked filing cabinet and any forms with identifying information (consent form and  
 408 contact sheet) will be kept in a separate location. Data is only accessible to personnel  
 409 involved with this research. Access is limited by the research facility being locked at all  
 410 times.

411  
 412  
 413 **XIII. Recording and Reporting of Adverse Effects**

414 Development of any adverse effects will be monitored closely by a project manager  
 415 such that fields capturing adverse events will be reviewed daily. At each study visit,  
 416 participants will be asked about the development of any other, new, or worsening  
 417 symptoms. At each visit and each phone call after the initial visit, participants in the e-  
 418 cigarette condition will be asked if they were experiencing any barriers to switching to e-  
 419 cigarettes or any concerns about switching. This open-ended format is intended to  
 420 capture any unexpected adverse events. Unexpected serious adverse events will be  
 421 reported to the CSUSM IRB and assessed by the PI to determine if related to e-

PROJECT SWITCH Protocol

NIH PROJECT #5SC3GM122628-02; CLINICALTRIAL.GOV IDENTIFIER: NCT03511001

422 cigarette use, and if so, reported to the NIH and FDA. Participants will be encouraged to  
423 contact staff if they have any questions, problems using their e-cigarette, or if any  
424 adverse events develop.
