# Supplementary material for: Effect of Pod e-Cigarettes vs Cigarettes on Carcinogen Exposure Among African American and Latinx Smokers: A Randomized Clinical Trial
Source: PubMed Central journal article supplement (PMC7675102; doi:10.1001/jamanetworkopen.2020.26324), 2020-11-18
Supplement: jamanetwopen-e2026324-s002.pdf [file jamanetwopen-e2026324-s002.pdf]

## Supplemental Online Content

Pulvers K, Nollen NL, Rice M, et al. Effect of pod e-cigarettes vs cigarettes on carcinogen exposure among African American and Latinx smokers: a randomized clinical trial. *JAMA Netw Open*. 2020;3(11):e2026324. doi:10.1001/jamanetworkopen.2020.26324

**eTable 1.** Pod Flavor Selection of e-Cigarette Group Participants at Baseline and Week 2

**eTable 2.** Sensitivity Analysis for the Addition of a Constant to NNAL Measurements at Week 6 to Enable a Logarithmic Transformation in the Presence of Some Zero Measurements

**eTable 3.** Baseline Characteristics According to Whether Participants Had a 6-Week NNAL Measurement

**eTable 4.** Effect of e-Cigarettes on Biomarkers of Exposure and Short-Term Cardiopulmonary Outcomes Adjusted for Marital Status

**eTable 5.** Sensitivity Analysis Removing the People With a History of Chronic Obstructive Pulmonary Disease for Effect of e-Cigarettes on Biomarkers of Exposure and Short-Term Cardiopulmonary Outcomes

**eTable 6.** Medians of Outcomes at Baseline, Week 2 and Week 6 by Study Randomization Group

**eTable 7.** Medians of Outcomes at Baseline, Week 2 and Week 6 by Week Six Tobacco Use Trajectory

**eFigure 1.** Patterns of Change in NNAL, CO, and Cotinine for e-Cigarette vs Control Group

**eFigure 2.** Patterns of Change in NNAL, CO, and Cotinine for e-Cigarette Trajectory Groups

This supplemental material has been provided by the authors to give readers additional information about their work.

**eTable 1.** Pod Flavor Selection of e-Cigarette Group Participants at Baseline and Week 2

| Timepoint                    | All          |              |              |                  | Kansas City  |         |              |                  | San Diego |              |              |                  |
|------------------------------|--------------|--------------|--------------|------------------|--------------|---------|--------------|------------------|-----------|--------------|--------------|------------------|
|                              | Menthol      | Mango        | Cool Mint    | Virginia Tobacco | Menthol      | Mango   | Cool Mint    | Virginia Tobacco | Menthol   | Mango        | Cool Mint    | Virginia Tobacco |
| Baseline<br>N=125            | 44<br>(35.2) | 35<br>(28.0) | 24<br>(19.2) | 22<br>(17.6)     | 38<br>(61.3) | 0 (0.0) | 12<br>(19.4) | 12<br>(19.4)     | 6 (9.5)   | 35<br>(55.6) | 12<br>(19.0) | 10<br>(15.9)     |
| Week 2 <sup>a</sup><br>N=113 | 39<br>(34.5) | 36<br>(31.9) | 17<br>(15.0) | 21<br>(18.6)     | 35<br>(60.3) | 2 (3.4) | 6 (10.3)     | 15<br>(25.9)     | 4 (7.3)   | 34<br>(61.8) | 11<br>(20.0) | 6 (10.9)         |

Notes. N (%) <sup>a</sup>Missing data for 12 participants (4 from Kansas City and 8 from San Diego) at Week 2.

**eTable 2.** Sensitivity Analysis for the Addition of a Constant to NNAL Measurements at Week 6 to Enable a Logarithmic Transformation in the Presence of Some Zero Measurements

| Constant | Within Group Change from Baseline                    |                                                       | Between Group Change                           |
|----------|------------------------------------------------------|-------------------------------------------------------|------------------------------------------------|
|          | E-cig ( <i>n</i> = 125)<br>Relative Risk<br>(95% CI) | Control ( <i>n</i> = 61)<br>Relative Risk<br>(95% CI) | E-Cig vs. Control<br>Relative Risk<br>(95% CI) |
| 1.0      | 0.33 (0.26, 0.42) ***                                | 0.92 (0.65, 1.30)                                     | 0.36 (0.23, 0.54) ***                          |
| 0.2      | 0.28 (0.21, 0.38) ***                                | 0.92 (0.61, 1.38)                                     | 0.31 (0.19, 0.51) ***                          |
| 0.5      | 0.31 (0.24, 0.40) ***                                | 0.92 (0.63, 1.34)                                     | 0.33 (0.21, 0.53) ***                          |
| 0.8      | 0.32 (0.25, 0.41) ***                                | 0.92 (0.64, 1.31)                                     | 0.35 (0.23, 0.54) ***                          |
| 1.2      | 0.33 (0.26, 0.42) ***                                | 0.92 (0.65, 1.30)                                     | 0.36 (0.24, 0.55) ***                          |
| 1.5      | 0.34 (0.27, 0.43) ***                                | 0.92 (0.66, 1.29)                                     | 0.37 (0.25, 0.56) ***                          |

Notes: NNAL Normalized for creatinine; One sample missing; A constant of one was used for the primary analysis.

\*\*\*  $p \leq .001$ ; \*\*  $p \leq .01$ ; \*  $p \leq .05$

**eTable 3.** Baseline Characteristics According to Whether Participants Had a 6-Week NNAL Measurement

| Variable                                          | Non-Missing<br>( <i>n</i> = 168) | Missing<br>( <i>n</i> = 18) |
|---------------------------------------------------|----------------------------------|-----------------------------|
|                                                   | Mean (SD) or N (%)               | Mean (SD) or N (%)          |
| Age                                               | 44.1 (12.5)                      | 35.8 (9.4) **               |
| Sex, % female                                     | 70 (41.7)                        | 5 (27.8)                    |
| African American                                  | 90 (53.6)                        | 2 (11.1) **                 |
| Latinx                                            | 78 (46.4)                        | 16 (88.9) **                |
| Education, ≤ high school                          | 94 (56.0)                        | 8 (44.4)                    |
| Income, ≤ 200% FPL                                | 124 (73.8)                       | 14 (77.8)                   |
| Marital status, never married                     | 77 (45.8)                        | 13 (72.2)                   |
| Menthol smoker, % yes                             | 94 (56.0)                        | 8 (44.4)                    |
| Number years smoking                              | 17.0 (13.0)                      | 15.7 (9.5)                  |
| Time to first cigarette ≤ 30 min                  | 121 (72.0)                       | 14 (77.8)                   |
| Days smoked/past 7 <sup>1</sup>                   | 6.8 (0.6)                        | 6.9 (0.5)                   |
| Cigarettes per day/past 7 <sup>1</sup>            | 12.3 (7.4)                       | 10.5 (4.2)                  |
| Days used EC/past 7 <sup>1</sup>                  | 0.0 (0.3)                        | 0.1 (0.5)                   |
| EC times on days used/past 7 <sup>1</sup>         | 0.1 (0.5)                        | 0.1 (0.4)                   |
| History of COPD, % yes                            | 10 (6.0)                         | 0                           |
| History of asthma, % yes                          | 37 (22.0)                        | 4 (22.2)                    |
| Mental health history, % any history <sup>2</sup> | 97 (57.7)                        | 10 (55.6)                   |
| History of substance abuse, % yes                 | 80 (47.6)                        | 8 (44.4)                    |
| Urine Cotinine, ng/mg <sup>3</sup>                | 1314.9 (1330.6)                  | 1258.6 (1344.7)             |
| Urine NNAL, pg/mg <sup>3</sup>                    | 144.6 (121.5)                    | 86.5 (79.5) *               |
| Carbon monoxide (CO), ppm                         | 18.5 (10.3)                      | 16.4 (10.3)                 |
| Lung function, FEF 25-75%, L/sec <sup>4</sup>     | 3.0 (1.4)                        | 3.6 (1.2)                   |
| Respiratory symptoms                              | 11.2 (8.5)                       | 11.7 (7.7)                  |
| Systolic blood pressure, mmHg                     | 129.3 (17.0)                     | 129.7 (14.6)                |
| Diastolic blood pressure, mmHg                    | 82.4 (10.1)                      | 80.7 (10.9)                 |

Notes: <sup>1</sup>From 7-day timeline follow-back; <sup>2</sup>Self-reported history of depression, anxiety, PTSD, or schizophrenia; <sup>3</sup>Normalized for creatinine;

<sup>4</sup>Mean forced expiratory flow between 25% and 75% of forced vital capacity; \*\*\*  $p \leq .001$ ; \*\*  $p \leq .01$ ; \*  $p \leq .05$

**eTable 4.** Effect of e-Cigarettes on Biomarkers of Exposure and Short-Term Cardiopulmonary Outcomes Adjusted for Marital Status

| Variable                                                       | Within Group Change from Baseline                    |                                                    | Between Group Change                           |
|----------------------------------------------------------------|------------------------------------------------------|----------------------------------------------------|------------------------------------------------|
|                                                                | E-cig ( <i>n</i> = 125)<br>Relative Risk<br>(95% CI) | Control ( <i>n</i> = 61)<br>Relative Risk (95% CI) | E-Cig vs. Control<br>Relative Risk<br>(95% CI) |
| <b>NNAL, pg/ml<sup>1</sup></b><br>Week 6 <sup>2</sup>          | 0.33 (0.26, 0.42) ***                                | 0.92 (0.65, 1.30)                                  | 0.36 (0.23, 0.54) ***                          |
| <b>Cotinine, ng/ml<sup>1</sup></b><br>Week 6                   | 0.93 (0.78, 1.12)                                    | 1.17 (0.90, 1.53)                                  | 0.80 (0.58, 1.10)                              |
| <b>Carbon monoxide (CO), ppm</b><br>Week 2<br>Week 6           | 0.45 (0.38, 0.52) ***<br>0.48 (0.41, 0.55) ***       | 0.98 (0.79, 1.22)<br>0.90 (0.73, 1.09)             | 0.45 (0.35, 0.59) ***<br>0.53 (0.42, 0.68) *** |
| <b>Cigarettes, past 7 days<sup>3</sup></b><br>Week 2<br>Week 6 | 0.23 (0.18, 0.30) ***<br>0.23 (0.18, 0.30) ***       | 0.95 (0.73, 1.23)<br>0.77 (0.59, 1.01)             | 0.25 (0.17, 0.36) ***<br>0.30 (0.20, 0.43) *** |
| <b>Respiratory symptoms, per point</b>                         |                                                      |                                                    |                                                |
| Week 2<br>Week 6                                               | 0.90 (0.78, 1.05)<br>0.70 (0.60, 0.83) ***           | 1.20 (0.97, 1.47)<br>1.11 (0.87, 1.42)             | 0.76 (0.59, 0.97) *<br>0.63 (0.47, 0.85) **    |
| <b>Lung function, FEF 25-75%, L/sec<sup>4</sup></b>            |                                                      |                                                    |                                                |
| Week 2<br>Week 6                                               | 0.99 (0.92, 1.07)<br>0.96 (0.88, 1.04)               | 1.01 (0.91, 1.12)<br>1.01 (0.89, 1.14)             | 0.98 (0.87, 1.12)<br>0.95 (0.82, 1.11)         |
| <b>Systolic blood pressure, mmHg</b>                           |                                                      |                                                    |                                                |
| Week 2<br>Week 6                                               | 1.00 (0.98, 1.02)<br>1.01 (0.98, 1.03)               | 1.01 (0.98, 1.04)<br>1.03 (0.99, 1.06)             | 0.99 (0.96, 1.03)<br>0.98 (0.94, 1.02)         |
| <b>Diastolic blood pressure, mmHg</b>                          |                                                      |                                                    |                                                |
| Week 2<br>Week 6                                               | 0.99 (0.97, 1.02)<br>1.00 (0.98, 1.02)               | 1.00 (0.97, 1.03)<br>1.00 (0.97, 1.03)             | 1.00 (0.96, 1.04)<br>1.00 (0.97, 1.04)         |

Notes: <sup>1</sup>Normalized for creatinine; <sup>2</sup>One sample missing; <sup>3</sup>From 7-day timeline follow-back, continuing smokers only (*n*= 126); <sup>4</sup>Mean forced expiratory flow between 25% and 75% of forced vital capacity; \*\*\* *p* ≤ .001; \*\* *p* ≤ .01; \* *p* ≤ .05

**eTable 5.** Sensitivity Analysis Removing the People With a History of Chronic Obstructive Pulmonary Disease for Effect of e-Cigarettes on Biomarkers of Exposure and Short-Term Cardiopulmonary Outcomes

| Variable                                                       | Within Group Change from Baseline                    |                                                    | Between Group Change                           |
|----------------------------------------------------------------|------------------------------------------------------|----------------------------------------------------|------------------------------------------------|
|                                                                | E-cig ( <i>n</i> = 125)<br>Relative Risk<br>(95% CI) | Control ( <i>n</i> = 61)<br>Relative Risk (95% CI) | E-Cig vs. Control<br>Relative Risk<br>(95% CI) |
| <b>NNAL, pg/ml<sup>1</sup></b><br>Week 6 <sup>2</sup>          | 0.32 (0.25, 0.42) ***                                | 0.92 (0.65, 1.30)                                  | 0.35 (0.23, 0.54) ***                          |
| <b>Cotinine, ng/ml<sup>1</sup></b><br>Week 6                   | 0.94 (0.77, 1.14)                                    | 1.17 (0.89, 1.53)                                  | 0.80 (0.58, 1.12)                              |
| <b>Carbon monoxide (CO), ppm</b><br>Week 2<br>Week 6           | 0.45 (0.38, 0.52) ***<br>0.48 (0.41, 0.55) ***       | 0.98 (0.79, 1.22)<br>0.89 (0.73, 1.09)             | 0.46 (0.35, 0.60) ***<br>0.54 (0.42, 0.69) *** |
| <b>Cigarettes, past 7 days<sup>3</sup></b><br>Week 2<br>Week 6 | 0.22 (0.16, 0.28) ***<br>0.23 (0.17, 0.30) ***       | 0.95 (0.73, 1.23)<br>0.77 (0.59, 1.01)             | 0.23 (0.16, 0.33) ***<br>0.29 (0.20, 0.43) *** |
| <b>Respiratory symptoms, per point</b>                         |                                                      |                                                    |                                                |
| Week 2<br>Week 6                                               | 0.91 (0.78, 1.06)<br>0.73 (0.61, 0.87) ***           | 1.20 (0.97, 1.47)<br>1.11 (0.88, 1.42)             | 0.76 (0.59, 0.98) *<br>0.65 (0.49, 0.88) **    |
| <b>Lung function, FEF 25-75%, L/sec<sup>4</sup></b>            |                                                      |                                                    |                                                |
| Week 2<br>Week 6                                               | 1.00 (0.92, 1.07)<br>0.96 (0.88, 1.05)               | 1.01 (0.91, 1.11)<br>1.00 (0.89, 1.14)             | 0.99 (0.87, 1.12)<br>0.96 (0.82, 1.11)         |
| <b>Systolic blood pressure, mmHg</b>                           |                                                      |                                                    |                                                |
| Week 2<br>Week 6                                               | 1.00 (0.98, 1.02)<br>1.01 (0.98, 1.03)               | 1.01 (0.98, 1.04)<br>1.03 (0.99, 1.06)             | 0.99 (0.95, 1.03)<br>0.98 (0.94, 1.02)         |
| <b>Diastolic blood pressure, mmHg</b>                          |                                                      |                                                    |                                                |
| Week 2<br>Week 6                                               | 0.99 (0.97, 1.02)<br>1.00 (0.98, 1.02)               | 1.00 (0.97, 1.03)<br>1.00 (0.97, 1.03)             | 0.99 (0.96, 1.04)<br>1.00 (0.96, 1.04)         |

Notes: <sup>1</sup>Normalized for creatinine; <sup>2</sup>One sample missing; <sup>3</sup>From 7-day timeline follow-back, continuing smokers only (*n* = 121); <sup>4</sup>Mean forced expiratory flow between 25% and 75% of forced vital capacity; \*\*\* *p* ≤ .001; \*\* *p* ≤ .01; \* *p* ≤ .05

**eTable 6.** Medians of Outcomes at Baseline, Week 2 and Week 6 by Study Randomization Group.

| Variable                                                   | EC Group                      |                             |                             | Cigarettes as Usual Control Group |                            |                             |
|------------------------------------------------------------|-------------------------------|-----------------------------|-----------------------------|-----------------------------------|----------------------------|-----------------------------|
|                                                            | Baseline<br>( <i>n</i> = 125) | Week 2<br>( <i>n</i> = 114) | Week 6<br>( <i>n</i> = 114) | Baseline<br>( <i>n</i> = 61)      | Week 2<br>( <i>n</i> = 57) | Week 6<br>( <i>n</i> = 54)  |
| Urine NNAL, pg/ml <sup>1</sup>                             | 124 (45, 197) <sup>a</sup>    | --                          | 40 (12, 101)                | 88 (58, 197)                      | --                         | 97 (39, 222)                |
| Urine Cotinine, ng/ml <sup>1</sup>                         | 928 (463, 1476) <sup>b</sup>  | --                          | 835 (476, 1334)             | 1061 (534, 1720)                  | --                         | 1289 (643, 2078)            |
| Carbon monoxide (CO), ppm                                  | 16 (11, 22)                   | 7 (3, 14)                   | 7 (3, 14)                   | 17 (11, 25)                       | 16 (11, 28)                | 16 (9, 25)                  |
| Cigarettes, past 7 days <sup>2</sup><br>Full sample        | 72 (49, 110)                  | 3 (0, 27)                   | 2 (0, 18)                   | 70 (45, 105)                      | 63 (48, 91)                | 58 (35, 77)                 |
| Cigarettes, past 7 days <sup>2</sup><br>Continuing smokers | 84 (49, 116) <sup>c</sup>     | 27 (7, 49) <sup>d</sup>     | 18 (7, 49) <sup>e</sup>     | 70 (45, 105)                      | 63 (48, 91)                | 58 (35, 77)                 |
| Respiratory symptoms, per point                            | 11 (5, 18) <sup>b</sup>       | 9 (5, 15) <sup>e</sup>      | 7 (3, 12) <sup>a</sup>      | 8 (4, 13)                         | 10 (4, 16) <sup>b</sup>    | 9 (4, 16) <sup>b</sup>      |
| Lung function, FEF 25-75%,<br>L/sec <sup>3</sup>           | 3.0 (2.1, 4.1) <sup>b</sup>   | 3.0 (2.0, 4.1) <sup>f</sup> | 2.8 (1.8, 4.1)              | 2.8 (2.1, 4.0)                    | 2.7 (2.2, 3.9)             | 2.7 (2.1, 4.1) <sup>b</sup> |
| Systolic blood pressure, mmHg                              | 130 (115, 142)                | 129 (115, 144)              | 128 (117, 142)              | 129 (118, 140)                    | 130 (117, 144)             | 133 (122, 143)              |
| Diastolic blood pressure, mmHg                             | 81 (76, 89)                   | 81 (75, 89)                 | 83 (74, 89)                 | 83 (74, 88)                       | 83 (74, 88)                | 83 (75, 89)                 |

Notes: Median (25%, 75%). <sup>1</sup>Normalized for creatinine; <sup>2</sup>From 7-day timeline follow-back; <sup>3</sup>Mean forced expiratory flow between 25% and 75% of forced vital capacity; <sup>a</sup>Two samples missing; <sup>b</sup>One sample missing; <sup>c</sup>Sub-sample *n* = 65; <sup>d</sup>Sub-sample *n* = 54; <sup>e</sup>Four samples missing; <sup>f</sup>Three samples missing; <sup>g</sup>Sub-sample *n* = 56

**eTable 7.** Medians of Outcomes at Baseline, Week 2 and Week 6 by Week Six Tobacco Use Trajectory

| Variable                                               | EC Only                           |                          |                                   |                          | Dual EC+Cig                       |                                   |                                   |                          | Cig Only                         |                      |                                     |                               |
|--------------------------------------------------------|-----------------------------------|--------------------------|-----------------------------------|--------------------------|-----------------------------------|-----------------------------------|-----------------------------------|--------------------------|----------------------------------|----------------------|-------------------------------------|-------------------------------|
|                                                        | Baseline <sup>1</sup><br>(n = 32) | Week<br>2<br>(n =<br>32) | Baseline <sup>2</sup><br>(n = 32) | Week<br>6<br>(n =<br>32) | Baseline <sup>1</sup><br>(n = 77) | Week<br>2<br>(n =<br>77)          | Baseline <sup>2</sup><br>(n = 66) | Week<br>6<br>(n =<br>66) | Baseline <sup>1</sup><br>(n = 4) | Week<br>2<br>(n = 4) | Baseline <sup>2</sup><br>(n = 16)   | Week<br>6<br>(n =<br>16)      |
| Urine NNAL,<br>pg/ml <sup>3</sup>                      | --                                | --                       | 141<br>(66, 200)                  | 7<br>(3,<br>23)          | --                                | --                                | 108<br>(44, 203)                  | 47<br>(22,<br>103)       | --                               | --                   | 132<br>(57,<br>187) <sup>a</sup>    | 100<br>(70,<br>273)           |
| Urine<br>Cotinine,<br>ng/ml <sup>3</sup>               | --                                | --                       | 907<br>(377,<br>1551)             | 928<br>(525,<br>1409)    | --                                | --                                | 897<br>(474,<br>1363)             | 699<br>(441,<br>1090)    | --                               | --                   | 1081<br>(469,<br>1686) <sup>a</sup> | 1034<br>(836,<br>1502)        |
| Carbon<br>monoxide<br>(CO), ppm                        | 16<br>(10, 20)                    | 3<br>(2, 3)              | 18<br>(14, 23)                    | 3<br>(2, 3)              | 17<br>(12, 23)                    | 12<br>(5, 16)                     | 15<br>(11, 22)                    | 10<br>(6,<br>14)         | 13<br>(12, 17)                   | 9<br>(8, 11)         | 15<br>(12, 20)                      | 17<br>(13,<br>30)             |
| Cigarettes,<br>past 7 days <sup>4</sup>                | 67<br>(49, 92)                    | 0<br>(0, 0)              | 70<br>(46, 108)                   | 0<br>(0, 0)              | 70<br>(48, 116)                   | 11<br>(2, 34)                     | 73<br>(48, 105)                   | 5<br>(1,<br>18)          | 79<br>(60, 92)                   | 88<br>(67,<br>110)   | 87<br>(50, 129)                     | 70<br>(20,<br>90)             |
| Respiratory<br>symptoms,<br>per point                  | 6<br>(4, 20)                      | 6<br>(4, 10)             | 9<br>(5, 17)                      | 6<br>(2, 9) <sup>a</sup> | 12<br>(6, 17) <sup>a</sup>        | 10<br>(5, 15) <sup>b</sup>        | 11<br>(6, 19)                     | 9<br>(4,<br>14)          | 14<br>(7, 20)                    | 19<br>(15,<br>20)    | 8<br>(5, 14) <sup>a</sup>           | 10<br>(7,<br>14) <sup>a</sup> |
| Lung<br>function, FEF<br>25-75%,<br>L/sec <sup>5</sup> | 3.3<br>(2.6, 4.3)                 | 2.9<br>(1.9,<br>4.2)     | 3.0<br>(2.1, 4.1)                 | 2.7<br>(1.9,<br>4.0)     | 2.8<br>(2.0,<br>3.8) <sup>a</sup> | 3.1<br>(2.0,<br>4.1) <sup>c</sup> | 3.0<br>(2.0, 4.3)                 | 2.7<br>(1.7,<br>4.3)     | 4.4<br>(2.9,<br>5.6)             | 2.7<br>(1.4,<br>4.2) | 2.8<br>(2.1, 3.7)                   | 2.9<br>(1.9,<br>3.4)          |
| Systolic blood<br>pressure,<br>mmHg                    | 121<br>(114,<br>134)              | 120<br>(113,<br>133)     | 124<br>(114,<br>133)              | 123<br>(114,<br>133)     | 133<br>(120,<br>144)              | 132<br>(119,<br>146)              | 132<br>(115,<br>143)              | 129<br>(118,<br>142)     | 125<br>(105,<br>146)             | 124<br>(110,<br>141) | 136<br>(125,<br>158)                | 130<br>(122,<br>155)          |



|                                |                |                |                |                |                |                |                |                |                |                |                |                |
|--------------------------------|----------------|----------------|----------------|----------------|----------------|----------------|----------------|----------------|----------------|----------------|----------------|----------------|
| Diastolic blood pressure, mmHg | 78<br>(72, 90) | 79<br>(75, 87) | 80<br>(75, 90) | 80<br>(75, 86) | 82<br>(78, 89) | 83<br>(75, 89) | 82<br>(76, 88) | 83<br>(73, 89) | 83<br>(69, 97) | 82<br>(75, 89) | 87<br>(79, 95) | 85<br>(79, 97) |
|--------------------------------|----------------|----------------|----------------|----------------|----------------|----------------|----------------|----------------|----------------|----------------|----------------|----------------|

Notes: Median (25%, 75%). <sup>1</sup>Baseline comparison group matched to those in same tobacco use category at week 2. <sup>1</sup>Baseline comparison group matched to those in same tobacco use category at week 6. <sup>3</sup>Normalized for creatinine; <sup>4</sup>From 7-day timeline follow-back, full sample; <sup>5</sup>Mean forced expiratory flow between 25% and 75% of forced vital capacity; <sup>a</sup>One sample missing; <sup>b</sup>Four samples missing; <sup>c</sup>Three samples missing

**eFigure 1.** Patterns of Change in NNAL, CO, and Cotinine for e-Cigarette vs Control Group

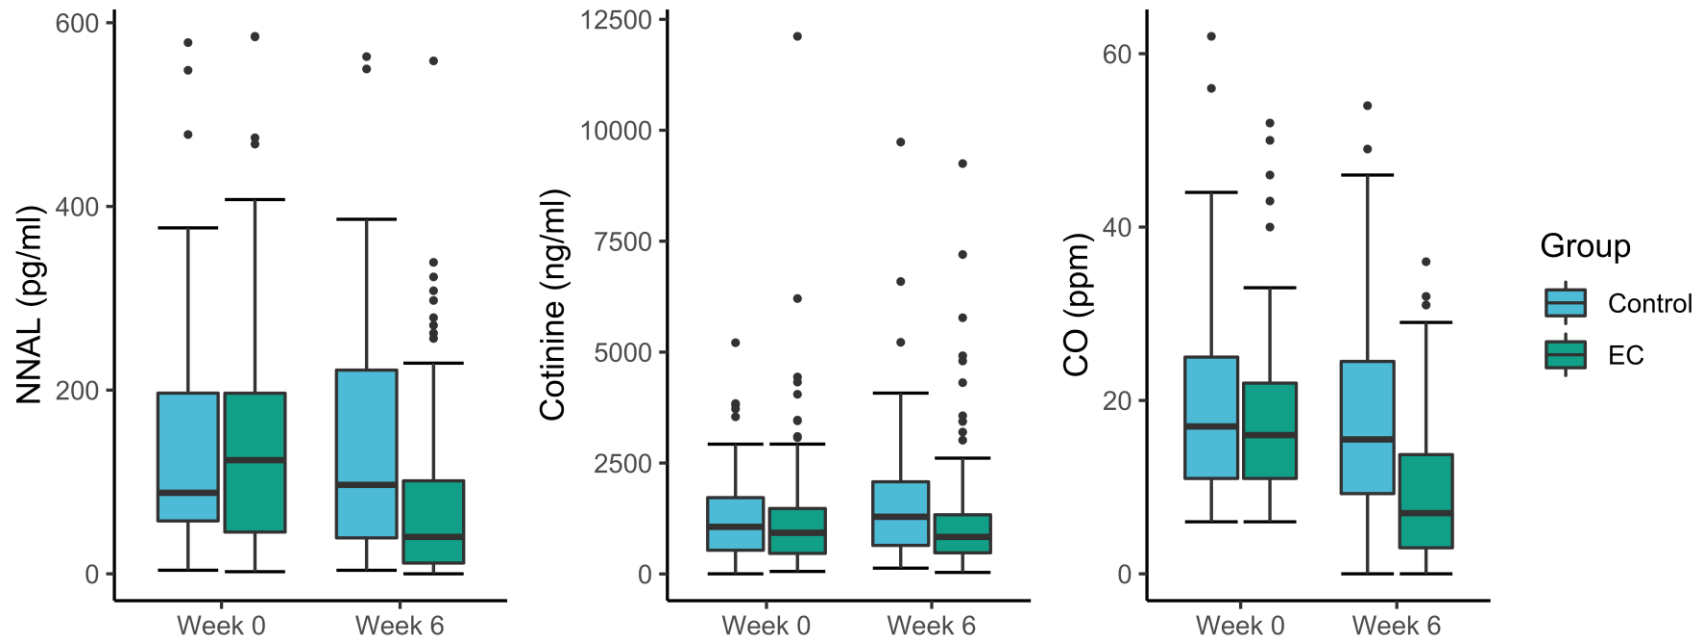

Notes: Median and interquartile range (25%-75%) reported. NNAL pg/ml and Cotinine ng/ml normalized for creatinine. Carbon monoxide (CO) reported in PPM. Significant between group changes for NNAL and CO,  $p < .001$ .

**eFigure 2.** Patterns of Change in NNAL, CO, and Cotinine for e-Cigarette Trajectory Groups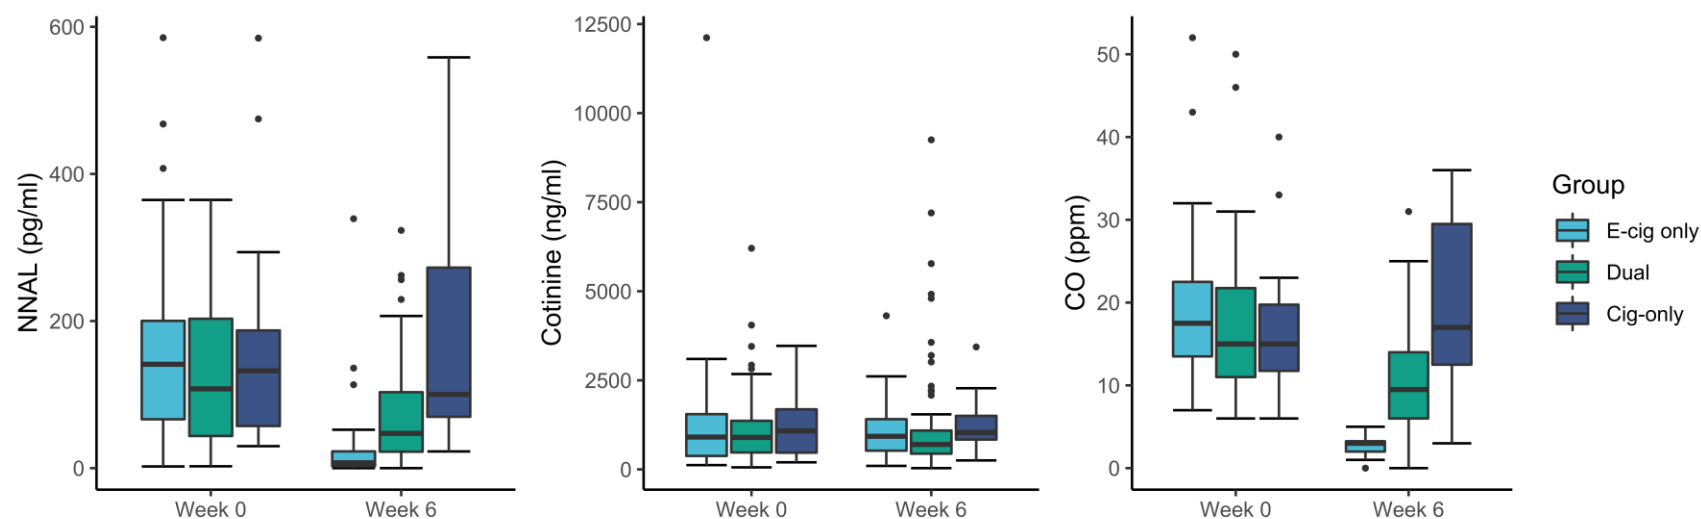

Notes: Median and interquartile range (25%-75%) reported. NNAL pg/ml and Cotinine ng/ml normalized for creatinine. Carbon monoxide (CO) reported in ppm.

Classification for EC trajectory groups at week 6: E-cig (EC) only is any use of ECs, no use of cigarettes in the past 7 days, and CO < 6 ppm; Those who reported no use of cigarettes in the past 7 days but who had a CO  $\geq$  6 were classified as dual users. Dual is any use of ECs and any use of cigarettes in the past 7 days; and Cig-only is no use of ECs and any use of cigarettes in the past 7 days.

Significant between group changes. NNAL: E-cig only vs Cig-only and E-cig only vs Dual,  $p < .001$ . Cotinine: None. CO: E-cig only vs Cig-only and E-cig only vs Dual,  $p < .001$ ; Dual vs Cig-only  $p < .01$ .
