# Supplementary material for: Effect of Pod e-Cigarettes vs Cigarettes on Carcinogen Exposure Among African American and Latinx Smokers: A Randomized Clinical Trial
Source: PubMed Central journal article supplement (PMC7675102; doi:10.1001/jamanetworkopen.2020.26324), 2020-11-18
Supplement: jamanetwopen-e2026324-s003.pdf [file jamanetwopen-e2026324-s003.pdf]

## **Data Sharing Statement**

Pulvers. Effect of Pod e-Cigarettes vs Cigarettes on Carcinogen Exposure Among African American and Latinx Smokers. *JAMA Network Open*. Published November 18, 2020.  
10.1001/jamanetworkopen.2020.26324

### **Data**

**Data available:** No
